# Supplementary material for: Ethnocultural perspectives on routine childhood vaccination during the COVID-19 pandemic: “Here in Canada, we're multicultural people, right?”
Source: Research Square preprint supplement (doi:10.21203/rs.3.rs-6771414/v1), 2025-07-10
Supplement: Supplementary file 1 [file 4df2d241c8d6a6e2e23bfc5f.docx]

**Additional File 1**

**Qualitative Interview Guide**

**Title of Project:** Acceptance and access to routine childhood vaccines among diverse Canadian populations during the COVID-19 pandemic (Pro00116703)

**Context for interview guide:**

The purpose of this study is to explore how various social intersections influence parents’ perceptions and beliefs about routine childhood vaccines, and experiences when accessing vaccination during the pandemic for their children ≤11 years old. Intersectionality is the interconnection of social determinants, and as a theoretical approach, also acknowledges overlapping and interdependent systems of discrimination1. Intersectional social determinants may include ethnocultural identities (i.e., newcomers, Racialized minority, Indigenous, or those who primarily speak minority languages) and social locations (i.e., household income, education, age) that when combined, may perpetuate health inequities2. This study builds on national data collected (Oct-Nov 2021) and reports on objective two study regarding how the COVID-19 pandemic has influenced parents’ perceptions of childhood vaccination, intentions to vaccinate their children, access to services, and uptake for their children ≤ 17 years old, across a diverse sample of underserved parents. This qualitative study will further explore parents’ perceived barriers and enablers to accessing childhood vaccines during the pandemic, and how previous experiences of discrimination may influence health related decision-making for their children.

Selection of interviewees will include parents who meet the NACI equity matrix3,4 criteria of ‘Racialized’ populations (i.e., ethnoracial and ethno-cultural diversity, immigration or refugee status) who also reported intersecting sociodemographic characteristics commonly associated with underserved population groups. Utilizing out COVImm survey data interview participant selection will include parents with the following characteristics:

1. parents who reported having only children aged 11 years or younger,
2. those who answered the survey in English, and
3. parents who reported one or more ethnocultural identity (i.e., Racialized minority, Indigenous, newcomers to Canada, minority language spoken most often at home, and those who reported past experienced of discrimination when accessing health services)

**Interview guide**

**Preamble:**

Thank you for participating in our national survey in Fall 2021, and also for agreeing to meet with me today. I am Robin Humble, a PhD student at the University of Alberta, working on this study as a part of my studies.

I come to you today from the traditional lands of the W̱SÁNEĆ people, on Vancouver Island, where I was born and raised, and now continue to live with my own family. My background is public health and women's health Nursing and epidemiology.

I am interviewing approximately 15 parents across Canada from diverse backgrounds and social groups in Canada. I am interested in your thoughts and experiences when accessing routine vaccines for your children during the pandemic. I am most interested in understanding how the COVID-19 pandemic may have affected your thoughts about routine childhood vaccines, or intentions to have your child receive routine vaccines, and perhaps what made it easy or challenging to have them vaccinated.

This interview is intended to be conversational. I have some questions prepared and I would welcome any other insights that you would like to offer. I am grateful for your participation in this interview; however, it is completely voluntary. If you would like to end the discussion or withdraw from the study at any point, you absolutely may do so. You also do not have to answer any question that you would rather not answer, and no explanation is needed. The interview should take approximately 30 minutes. I am requesting your permission to audio record this interview, to ensure I have correctly captured your perspectives. Again, just an audio recording, no video. The recording will be deleted after transcripts of the interview have been created. Do you agree with the recording? Do you have any questions about the study or the interview process before we start?

| **Name** (ID #) | **Province** | **Age** | **Sex** | **Income** | **# child** | **Intersections:** |
| --- | --- | --- | --- | --- | --- | --- |
|  |  |  |  |  |  |  |
| **Vaccination intent** | **Racism** | **Education** | | **Marital status** | | **Pandemic change:** |
|  |  |  | |  | |  |

**Ice-Breaker Question**

1. Would you share with me a little about yourself, such as where you come from, the work that you do, and/or something about your family?

**Topic Focus 1: Sociodemographic characteristics**

1. Would you feel comfortable sharing with me more about who you are and your background?

a. *Prompts:* What languages do you speak at home? What culture or ethnic group do you identify as belonging to? Can you share with me what brought you to Canada if Canada has not always been your home?

2. Can you describe for me your household family and the community in which you live?

1. **[Immediate family]** *Prompts:* How many people live in your household? How many adults and how many children and their ages?
2. **[Community]** *Prompts:* Can you describe where you live? (e.g., Urban/rural, type of home)
3. **[Access]** *Prompts*: Do you have access to a vehicle or public transportation? What community services do you and your family utilize? (Library, recreational centre)
4. **[Health services]**: *Prompts:* How do you access health care for your children? (Family physician, walk-in clinic, hospital)
5. **[Social network]**: *Prompts:* Can you describe your social network, such as individuals who you rely on or who you assist for day-to-day activities?

3. **[Survey]** *Prompts:* Other survey sociodemographic prompts specific to each respondent: relationship status (i.e., married/common-law, single parent home), employment, chronic illness of parent and/or child, citizenship, number of children, income, education, gender, etc.

**Topic Focus 2: Perceptions of routine childhood vaccination**

1**.**What do you think about  routine childhood vaccines in general? *I am not talking about influenza/COVID-19 vaccination.*

1. *Prompts:* what are your perceptions, beliefs, thoughts, experiences about vaccine preventable diseases and vaccines?

2. How are routine childhood vaccines generally thought of in your social network or community?

1. *Prompts*: how do others in your community (their social norms or beliefs) influence your decision-making around vaccinating your children?

3. To what extent (or how has)  the COVID-19 pandemic changed or impacted how you think about routine vaccines for your children?

**[Yes]** For example, are you more likely or less likely to get your children vaccinated? Would you encourage friends/family to get routine vaccines for their children? Have your feelings (perceptions) of the risk of vaccine preventable diseases changed?

**[No]** Please describe why you think the pandemic has not affected how you think about routine vaccines for your children.

**Topic Focus 3: Routine childhood vaccine uptake during the pandemic**

1. Did any of your children receive a routine vaccine since the start of the pandemic?

*[As mentioned, when talking about “routine childhood vaccines” some examples may include vaccines recommended for your infant, preschool and/or school aged child. These may include measles, mumps, rubella, and/or meningococcal vaccines among others. We are not talking about influenza or COVID-19 vaccination for this interview]*

**[Yes]** Please tell me what motivated you to have your child receive their routine vaccinations.

**[Yes]** Please tell me about your experience accessing childhood vaccines during the pandemic.

a. [Logistics] *Prompts:* when and location of immunization, on-time or delayed vaccination, what vaccine, how many needles, age of child.

b. [Pandemic] *Prompts:* Social distancing measures, wearing a mask, gloves gown, contact with child, differences from pre-pandemic experiences.

c. [Access] *Prompts:* difficulty versus ease of access, transportation to appointment, distance, appointment availability.

**[No]** Were any of your children due for a routine vaccine, and you chose to delay or not get it for them since the start of the pandemic?

**[No]** Please  share, if you are comfortable, the reasons for delaying or choosing not to have your child vaccinated, whether it was for all vaccines or for one specific vaccine.

**Topic Focus 4: Previous experiences influencing perceptions/intentions of routine childhood vaccination**

1.  Have you had other experiences in your life or in your family’s lives that you believe influence how you think about (perceive) routine childhood vaccines?

1. *Prompts:* experiences in another country, side effects, infectious disease illness, experiences with health care providers.

2. Could you share with me your definition of discrimination or stereotyping?

3. In the past when accessing health services for yourself or your children, have you experienced what you perceived as discrimination, racism? How about feeling stereotyped?

**[Yes]** If comfortable, please share your experiences with me.

**[Yes]** How has/have this/these experience(s) influenced your decision-making and/or how you think about (perceptions) getting health services for your children?

**Topic Focus 5: Barriers/challenges to accessing routine childhood vaccines**

1. What makes it difficult or challenging for you to receive routine vaccines for your child(ren)?

1. **[Access & logistics]** *Prompts:* transportation, finances, time off work, other children requiring daycare, location of vaccination services, distance to clinic, vaccination information in a language that is easy to understand and in the language you understand most easily
2. **[Social and personal reasons]** *Prompts:* An awareness that routine vaccines are needed for your children (i.e., understanding vaccine schedules, number of vaccines, fear of needles, children’s health issues, concerns about safety of vaccines, concerns about culturally safe vaccination services).

**Topic Focus 6: Facilitators to accessing childhood vaccines**

1. As we have just discussed some of the challenges in accessing routine vaccines for your children, I invite you to share with me any suggestions or ideas that could make it easier for you and your family. **[OR]** What would make it easy for you to get your child(ren) vaccinated?
2. **[Access & logistics]** *Prompts*: transportation, finances, time off work, other children requiring daycare, location of vaccination services, distance to clinic,
3. **[Social and personal reasons]** *Prompts*: literacy, understanding vaccine schedules, number of vaccines, fear of needles, children’s health issues, concerns about safety of vaccines, concerns about culturally safe vaccination services.

**WRAP UP:**

1.Do you have any additional comments about routine childhood vaccines, and your experiences in getting (accessing) these vaccines during the pandemic?

2.   Is there anything else that you wanted to share with me, that I haven’t addressed?

*[Thank interview for participating and remind them that in gratitude for their time and contributions to the study, a gift card will be sent within 1 week.]*

**References**

1. Government of Canada. Applicants assisting ethnocultural communities. Jun 30, 2005. Accessed Jan 28, 2024. <https://www.canada.ca/en/revenue-agency/services/charities-giving/charities/policies-guidance/policy-statement-023-applicants-assisting-ethnocultural-communities.html>
2. Van Herk KA, Smith D, Andrew C. Examining our privileges and oppressions: incorporating an intersectionality paradigm into nursing. *Nurs. Inq*. 2011;18:29-39. <https://doi.org/10.1111/j.1440-1800.2011.00539.x>
3. Ismail SJ, Hardy K, Tunis MC, Young K, Sicard N, Quach C. A framework for the systematic consideration of ethics, equity, feasibility, and acceptability in vaccine program recommendations. *Vaccine.* 2020;38:5861-5876. <https://doi.org/10.1016/j.vaccine.2020.05.051>
4. Ismail SJ, Tunis MC, Zhao L, Quach C. Navigating inequities: a roadmap out of the pandemic. *BMJ Global Health*. 2021;6(1):e004087-. <https://doi.org/10.1136/bmjgh-2020-004087>
